# Supplementary material
Source: Elsevier journal article supplement (https://www.sciencedirect.com/science/article/pii/S0214158219300489)
Supplement: mmc1 [file S0214158219300489:mmc1.docx]

**MATERIAL SUPLEMENTARIO**

**Tabla S1**: Relación de los 76 SNPs utilizados en el estudio con sus frecuencias alélicas y los OR.

|  | SNPs | MAF | Alelo minoritario | OR |
| --- | --- | --- | --- | --- |
| 1 | rs10069690 | 0,276 | T | 1.06 |
| 2 | rs1045485 | 0,150 | C | 0.88 |
| 3 | rs10474352 | 0,159 | T | 0.94 |
| 4 | rs10771399 | 0,145 | G | 0.79 |
| 5 | rs10816625 | 0,103 | G | 1.11 |
| 6 | rs10931936 | 0,224 | T | 0.88 |
| 7 | rs10941679 | 0,248 | G | 1.15 |
| 8 | rs10995190 | 0,192 | A | 0.86 |
| 9 | rs10995201 | 0,187 | G | 0.9 |
| 10 | rs11249433 | 0,500 | G | 1.11 |
| 11 | rs113577745 | 0,093 | G | 1.08 |
| 12 | rs11571833 | 0,014 | T | 1.35 |
| 13 | rs11814448 | 0,028 | C | 1.12 |
| 14 | rs11977670 | 0,355 | A | 1.06 |
| 15 | rs12422552 | 0,313 | C | 1.06 |
| 16 | rs12443621 | 0,504 | G | 1.11 |
| 17 | rs12710696 | 0,308 | T | 1.03 |
| 18 | rs1292011 | 0,416 | G | 0.92 |
| 19 | rs13066793 | 0,107 | G | 0.94 |
| 20 | rs13281615 | 0,486 | G | 1.11 |
| 21 | rs13294895 | 0,178 | T | 1.06 |
| 22 | rs13329835 | 0,229 | G | 1.07 |
| 23 | rs13365225 | 0,145 | G | 0.91 |
| 24 | rs13387042 | 0,463 | G | 0.83 |
| 25 | rs1432679 | 0,509 | C | 1.08 |
| 26 | rs16857609 | 0,248 | T | 1.06 |
| 27 | rs16991615 | 0,079 | A | 1.1 |
| 28 | rs17356907 | 0,285 | G | 0.91 |
| 29 | rs1895062 | 0,481 | G | 0.94 |
| 30 | rs2046210 | 0,397 | A | 1.11 |
| 31 | rs2236007 | 0,252 | A | 0.93 |
| 32 | rs2290203 | 0,215 | A | 0.94 |
| 33 | rs2363956 | 0,463 | T | 1.19 |
| 34 | rs2588809 | 0,243 | T | 1.06 |
| 35 | rs2747652 | 0,477 | T | 0.94 |
| 36 | rs2823093 | 0,243 | A | 0.94 |
| 37 | rs2943559 | 0,093 | G | 1.1 |
| 38 | rs2981579 | 0,397 | A | 1.43 |
| 39 | rs2992756 | 0,481 | T | 1.06 |
| 40 | rs3757322 | 0,369 | G | 1.08 |
| 41 | rs3803662 | 0,252 | A | 1.2 |
| 42 | rs4442975 | 0,481 | T | 0.89 |
| 43 | rs45631563 | 0,042 | T | 0.81 |
| 44 | rs4784227 | 0,238 | T | 1.23 |
| 45 | rs4808801 | 0,336 | G | 0.93 |
| 46 | rs4849887 | 0,150 | T | 0.91 |
| 47 | rs4973768 | 0,551 | T | 1.11 |
| 48 | rs554219 | 0,141 | G | 1.21 |
| 49 | rs58058861 | 0,117 | A | 1.06 |
| 50 | rs58847541 | 0,159 | A | 1.08 |
| 51 | rs6001930 | 0,103 | C | 1.12 |
| 52 | rs614367 | 0,146 | T | 1.15 |
| 53 | rs616488 | 0,322 | G | 0.94 |
| 54 | rs6472903 | 0,145 | G | 0.94 |
| 55 | rs6507583 | 0,084 | G | 0.92 |
| 56 | rs2380205 | 0,449 | T | 0.94 |
| 57 | rs6815814 | 0,444 | C | 1.06 |
| 58 | rs6828523 | 0,084 | A | 0.91 |
| 59 | rs704010 | 0,453 | T | 1.07 |
| 60 | rs72749841 | 0,243 | C | 0.93 |
| 61 | rs72755295 | 0,028 | G | 1.15 |
| 62 | rs72826962 | 0,014 | T | 1.2 |
| 63 | rs7297051 | 0,234 | T | 0.89 |
| 64 | rs73161324 | 0,033 | T | 1.06 |
| 65 | rs7529522 | 0,313 | C | 1.06 |
| 66 | rs75915166 | 0,061 | A | 1.28 |
| 67 | rs78269692 | 0,056 | C | 1.09 |
| 68 | rs8009944 | 0,262 | C | 0.88 |
| 69 | rs8170 | 0,140 | A | 1.26 |
| 70 | rs865686 | 0,388 | G | 0.89 |
| 71 | rs889312 | 0,248 | C | 1.13 |
| 72 | rs909116 | 0,514 | C | 1.17 |
| 73 | rs9397437 | 0,089 | A | 1.17 |
| 74 | rs9693444 | 0,364 | A | 1.06 |
| 75 | rs9790879 | 0,388 | C | 1.1 |
| 76 | rs9833888 | 0,215 | T | 1.06 |
